# Supplementary material for: Free radical induced selenoxide formation in isomeric organoselenium compounds: the effect of chemical structures on antioxidant activity
Source: Royal Society of Chemistry journal article supplement (doi:10.1039/c9nj02227a), 2019-01-01
Supplement: c9nj02227a1.pdf [file c9nj02227a1.pdf]

## Supporting information

### **Free radical induced selenoxide formation in isomeric organoselenium compounds: Role of chemical structure on antioxidant activity.**

**Beena G. Singh,<sup>\*a,b</sup> Pavitra Kumar,<sup>a,b</sup> P. Phadnis<sup>c</sup>, Michio Iwaoka,<sup>d</sup> and K. Indira Priyadarsini<sup>b,c,\*</sup>**

<sup>a</sup>Radiation & Photochemistry Division, Bhabha Atomic Research Centre, Trombay, Mumbai-400085, India., <sup>b</sup>Homi Bhabha National Institute, Anushaktinagar, Mumbai – 400092, India, <sup>c</sup>Chemistry Division, Bhabha Atomic Research Centre, Trombay, Mumbai – 400085, <sup>d</sup>Department of Chemistry, School of Science, Tokai University, Kitakaname, Hiratsuka-shi, Kanagawa 259-1292, Japan.

\*Corresponding authors: [beenam@barc.gov.in](mailto:beenam@barc.gov.in); [kindira@barc.gov.in](mailto:kindira@barc.gov.in) .

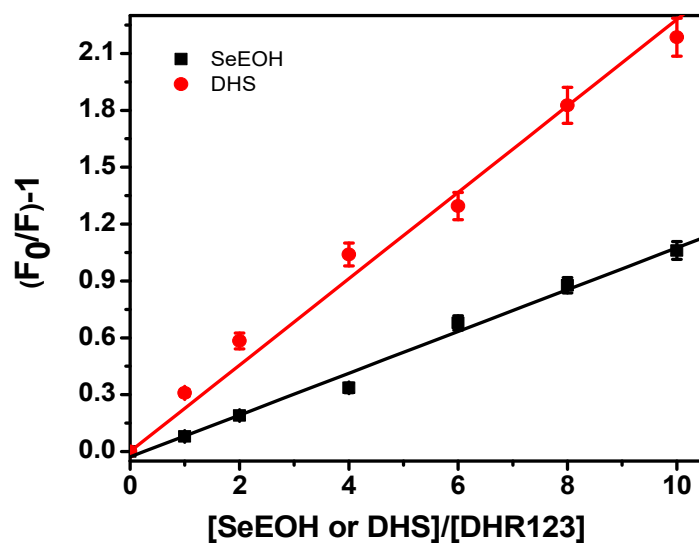

**Figure S1:** Linear plot for variation of  $(F_0/F-1)$  as a function of concentration ratio of SeEOH/DHS and DHR123 ( $[SeEOH \text{ or DHS}]/[DHR123]$ ).

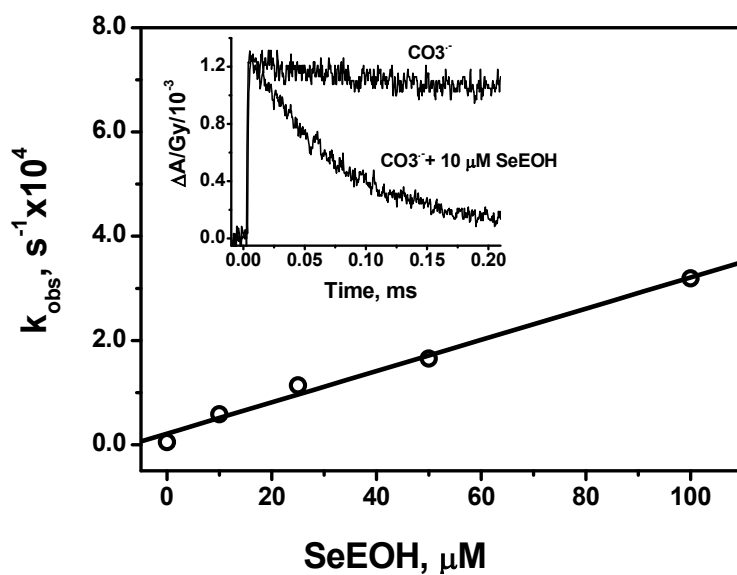

**Figure S2:** The absorption-time plot of  $\text{CO}_3^{\bullet-}$  radical at 600 nm in absence and presence of 10  $\mu\text{M}$  SeEOH at pH 7.5.

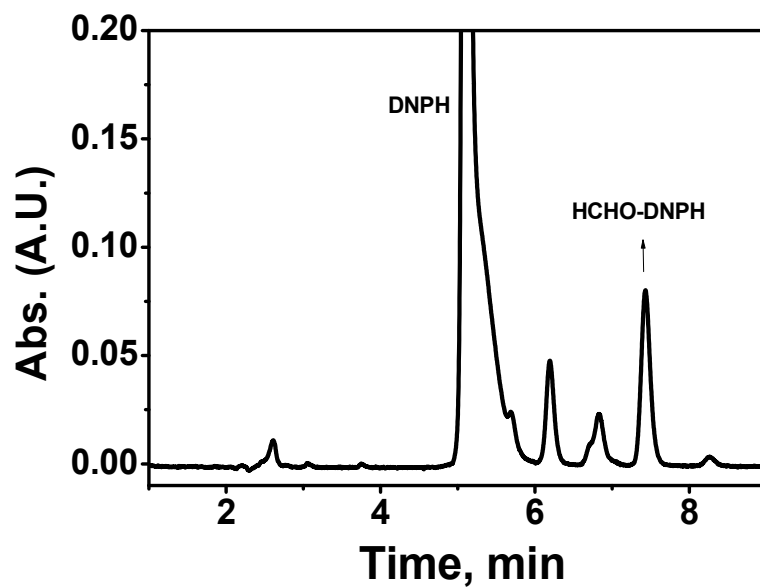

**Figure S3:** HPLC chromatograms generated by reaction of acidified DNPH (4 mM) with radiolyzed samples of 5 mM of SeEOH.

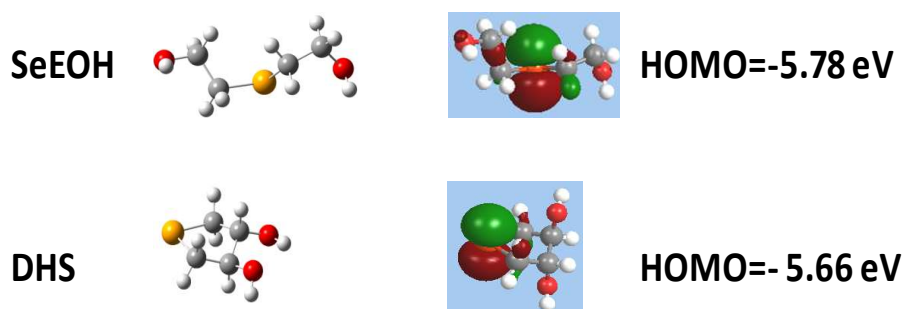

**Figure S4:** Optimized structures and HOMO levels of SeEOH and DHS in ground state.
